# Supplementary material for: Nest Turrets of Acromyrmex Grass-Cutting Ants: Micromorphology Reveals Building Techniques and Construction Dynamics
Source: Insects. 2020 Feb 24;11(2):140. doi: 10.3390/insects11020140 (PMC7073553; doi:10.3390/insects11020140)
Supplement: Supplementary file 1 [file insects-11-00140-s001.zip › Raw data file_Cosarinsky et al 2020.xlsx]

## Sheet: Tabelle1
Raw Data -
Manuscipt:
Nest turrets of Acromyrmex grass-cutting ants: micromorphology reveals building techniques and construction dynamics
Cosarinsky M I, Römer D and Roces F
Turret Dimenstions (in mm)							Turret composition (in g)				Figure 6e:					Figure S2 - Supp. Material						Figure S3 - Supp. Material
# turret	diameter base 1	diameter base 2	diameter top	diameter opening	height		# turret	clay dry	plants dry			Number of beams (n=10):
1	2.5	2.7	2	1.3	2.8		1	1.2051	0.653			base	middle	top		Lining fabrics - TOP						Microstructures - TOP
2	3.9	5.3	2.3	1.1	3.8		2	0.6353	0.366		First day	3	2	0			Linig fabrics (n=9):						Microstrutures (n=10):
3	4.8	4.4	2.7	1.4	3.4		3	0.8359	0.2471		Second day	7	5	0			not lined	open	intermediate	close			single fiber	cem. fiber	pelletal	spongy
4	5.5	4.3	2.5	0.8	3.8		4	2.2042	0.9533		Third day	8	4	2		First day	3	5	1	0		First day	5	0	5	0
5	4.9	3	1.9	1	3.4		5	0.3416	0.3882		Original turret	8	5	1		Second day	3	5	1	0		Second day	5	0	5	0
6	2.8	3.2	1.7	0.6	2.8											Third day	3	3	0	3		Third day	3	2	5	0
7	2.6	3.8	1.7	0.6	2.7
8	2.3	2.5	1.5	0.9	2.7											Lining fabrics - MIDDLE						Microstructures - MIDDLE
9	4.6	4.4	1.5	0.7	2.8												Linig fabrics (n=9):						Microstrutures (n=10):
10	3	3.7	1.5	0.6	2.7												not lined	open	intermediate	close			single fiber	cem. fiber	pelletal	spongy
11	2.1	3	1.5	0.7	3											First day	0	6	3	0		First day	1	3	6	0
12	1.9	2.6	1.8	0.9	2.4											Second day	0	5	4	0		Second day	2	3	5	0
13	2.2	2.5	1.8	0.7	2.5											Third day	0	2	1	6		Third day	1	2	7	0
14	3.8	3.6	2.8	1.5	2.7
15	2.7	3	1.5	0.7	2.9											Lining fabrics - BASE						Microstructures - BASE
16	2.6	3.9	2.3	0.9	2.8												Linig fabrics (n=9):						Microstrutures (n=10):
17	4	3.5	2.3	1.2	2.4												not lined	open	intermediate	close			single fiber	cem. fiber	pelletal	spongy
18	3.5	3.4	2.2	1	2.8											First day	0	2	6	1		First day	1	1	8	0
19	3.3	3.9	1.8	0.9	3											Second day	0	2	6	1		Second day	2	1	2	5
20	3.4	3.9	1.5	1	3.2											Third day	0	1	1	7		Third day	0	1	2	7
21	2.8	3.4	2.1	1.3	3.2
22	3.3	2.8	2	1	3.4
23	3.5	3.9	2.3	1.1	2.8
24	1.9	2.4	1.3	0.7	2.1
25	3.9	4.2	2.6	1.1	2.1
26	2.5	3	1.7	0.9	2.2
27	3	2.9	2.1	0.8	2.8
28	2.1	2.5	1.7	0.8	2.2
29	2.3	2.6	2.1	1.2	2.2
30	2.6	3	2	0.8	3
31	2.2	2.4	1.8	0.7	2.4
32	3.6	2.9	2.1	0.8	3.8
33	2.3	3.1	2.2	1	2.3
34	4.5	2.7	2.2	1.3	2.8
35	3	3	1.7	1	2.9
36	3.8	3.5	2.2	1.1	2.7
37	2.4	2.1	1.6	0.6	3
38	2.4	3.1	2.2	0.9	3
39	2.8	2.8	2.1	1.1	2.9
40	3.3	2.9	2.1	1	3.2
